# Supplementary material for: Sensitivity of pretargeted immunoPET using 68Ga-peptide to detect colonic carcinoma liver metastases in a murine xenograft model: Comparison with 18FDG PET-CT
Source: PubMed Central journal article supplement (PMC6007947; doi:10.18632/oncotarget.25514), 2018-06-08
Supplement: oncotarget-09-27502-s001.pdf [file oncotarget-09-27502-s001.pdf]

## Sensitivity of pretargeted immunoPET using $^{68}\text{Ga}$ -peptide to detect colonic carcinoma liver metastases in a murine xenograft model: Comparison with $^{18}\text{F}$ FDG PET-CT

### SUPPLEMENTARY MATERIALS

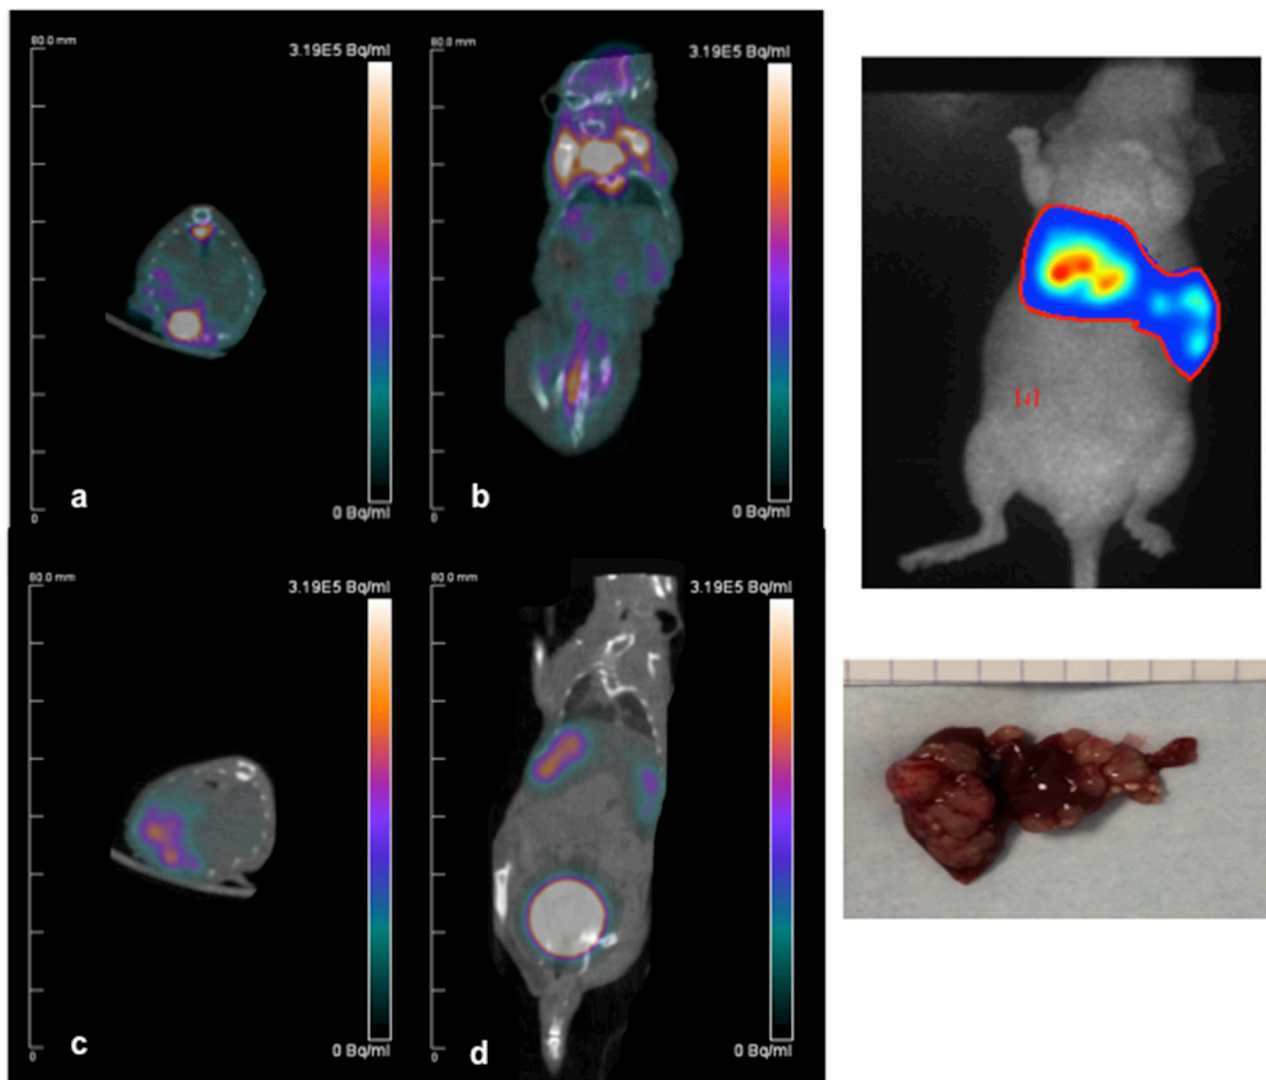

**Supplementary Figure 1: PET imaging of hepatic LS174T metastases.**  $^{18}\text{F}$ FDG PET-CT (a, b). Images obtained 1h after intravenous injection of 13 MBq of  $^{18}\text{F}$ FDG in axial (a) and coronal (b) view. Corresponding  $^{68}\text{Ga}$ -pPET-CT (c, d). Images obtained 1 hour after IV injection of 10.1 MBq of pretargeted  $^{68}\text{Ga}$ -IMP288. Corresponding bioluminescence imaging and photography after dissection.

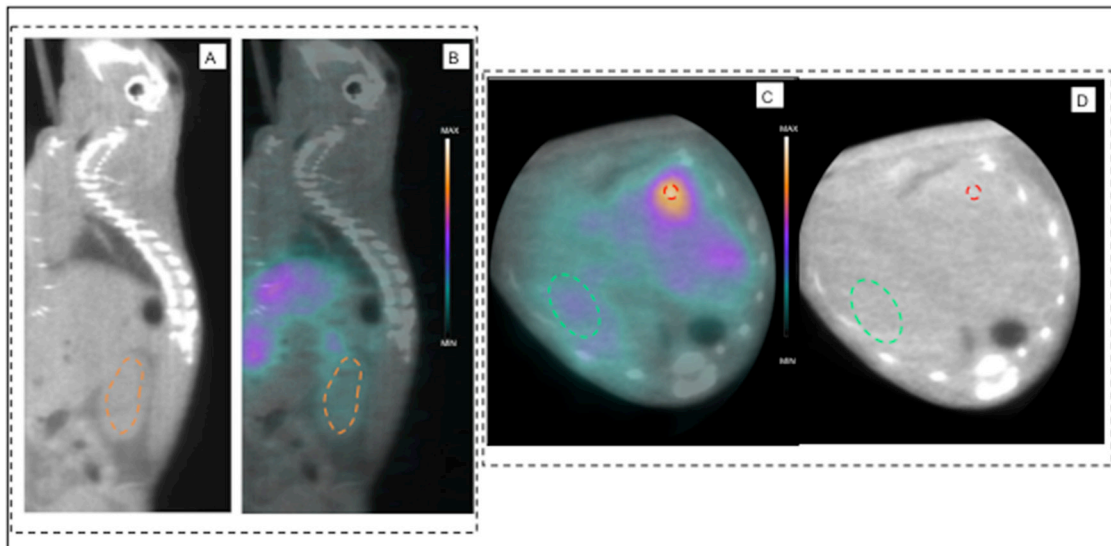

**Supplementary Figure 2: ROI measurements on 2D PET imaging.** For normal organs, values are obtained from a ROI drafted around the organ (kidney in orange (A, B) or on the organ (for poorly-limited organs, such as liver in green (C, D) in each of the 2 selected images (most intense uptake). For tumors (c,d), the highest uptake in the tumor is obtained from a constant ROI of 2 mm<sup>3</sup> drawn around the hottest spot (in red).
